# Supplementary material for: The CD2 isoform of protocadherin-15 is an essential component of the tip-link complex in mature auditory hair cells
Source: PubMed Central journal article supplement (PMC4119359; doi:10.15252/emmm.201403976), 2014-06-17
Supplement: emmm0006-0984-SD2.pdf [file emmm0006-0984-SD2.pdf]

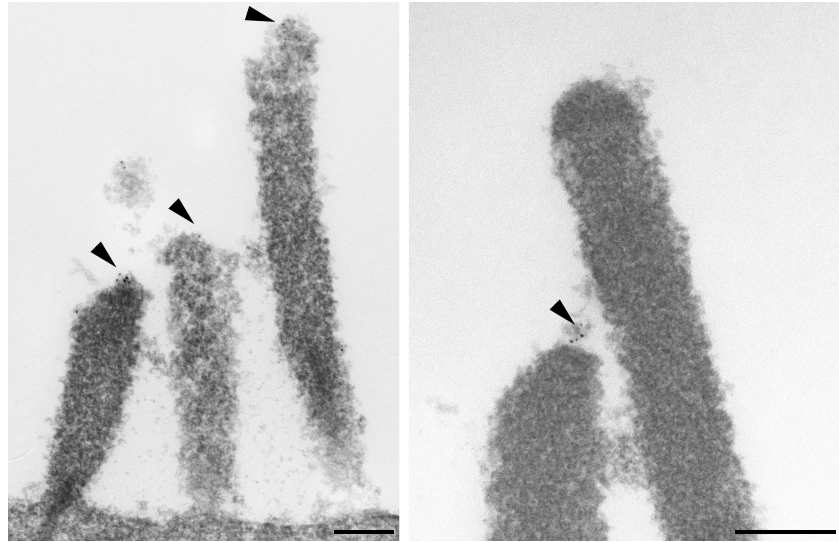

**Supplementary Figure S2: Immunogold labelling of Pcdh15-CD2 in a murine OHC**

Transmission electron micrograph of a Pcdh15-CD2 immunoreactive OHC hair bundle at P11 (left panel), and tip-link profile from an OHC at P15 (right panel). Arrowheads indicate gold particles that are located at the stereocilia tips.

Scale bars: 200 nm
