# Supplementary material for: The CD2 isoform of protocadherin-15 is an essential component of the tip-link complex in mature auditory hair cells
Source: PubMed Central journal article supplement (PMC4119359; doi:10.15252/emmm.201403976), 2014-06-17
Supplement: emmm0006-0984-SD3.pdf [file emmm0006-0984-SD3.pdf]

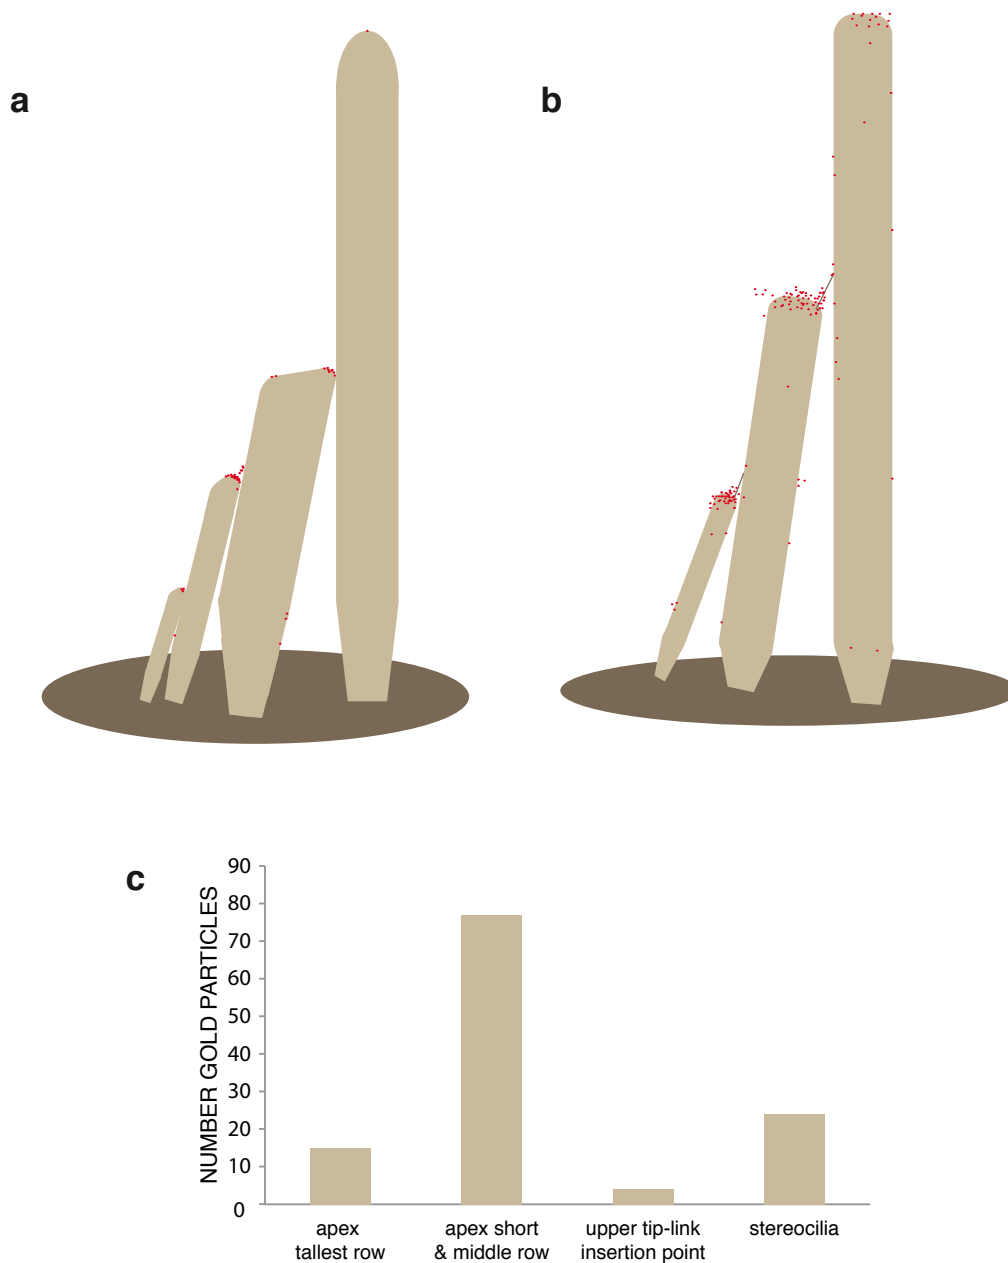

**Supplementary Figure S3: Distribution of gold particles in Pcdh15-CD2 immunoreactive hair bundles**

- (a) The distribution of gold particles in 9 sections of mature inner hair cells (n=39).
- (b) The distribution of gold particles in 16 sections of mature outer hair cells (n= 120).
- (c) Quantification of gold particles in outer hair cells is shown with histograms .
