# Supplementary material for: The CD2 isoform of protocadherin-15 is an essential component of the tip-link complex in mature auditory hair cells
Source: PubMed Central journal article supplement (PMC4119359; doi:10.15252/emmm.201403976), 2014-06-17
Supplement: emmm0006-0984-SD6.pdf [file emmm0006-0984-SD6.pdf]

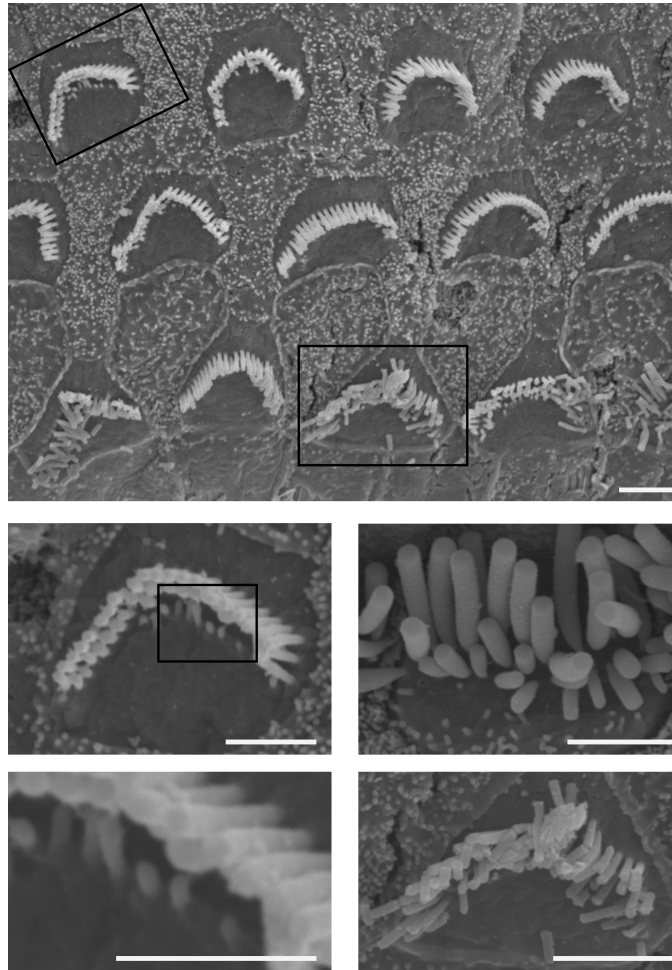

**Supplementary Figure S6: Morphological analysis of hair bundles in a KO *Pcdh15* $\Delta$ 'CD2 mouse**

Scanning electron micrograph showing the morphology of hair bundles in a KO *Pcdh15* $\Delta$ 'CD2 mouse on P30. Some OHC hair bundles show planar polarity defects. In OHCs no tip-links are visible, and short and middle row stereocilia have regressed. In IHCs the middle row stereocilia have lost their distal prolate shape indicating tip-link disruption. The short row of stereocilia has completely regressed.

Scale bar: 1  $\mu$ m
